# Supplementary material for: Collection, nucleic acid release, amplification, and visualization platform for rapid field detection of rice false smut
Source: Royal Society of Chemistry journal article supplement (doi:10.1039/d2lc01166b), 2023-01-01
Supplement: d2lc01166b1.pdf [file d2lc01166b1.pdf]

## Supporting information

### Collection, Nucleic Acid Release, Amplification, and Visualization Platform for Rapid Field Detection of Rice False Smut

Zongbao Sun<sup>a</sup>, Jiahao Qi<sup>a</sup>, Ye Shen<sup>a</sup>, Ning Yang<sup>b\*</sup>, Shuhua Liu<sup>c\*\*</sup>, Aiying Wang<sup>c</sup>, Cilin Wang<sup>c</sup>, and  
Jian Tang<sup>c</sup>

*a. Department of Food & Biological Engineering, Jiangsu University, Zhenjiang 212013, China*

*b. School of Electrical and Information Engineering, Jiangsu University, Zhenjiang 212013,  
China*

*c. China National Rice Research Institute, Hangzhou 310006, China*

\* Correspondence to: *School of Electrical and Information Engineering, Jiangsu University,  
Zhenjiang, China*

\*\* Correspondence to: *China National Rice Research Institute, Hangzhou, China*

\* E-mail: *yangning7410@163.com* (Ning Yang); *lsh2199\_cnrri@163.com* (Shuhua Liu)

**Figure S1. The collection device and internal structure of the chip.**

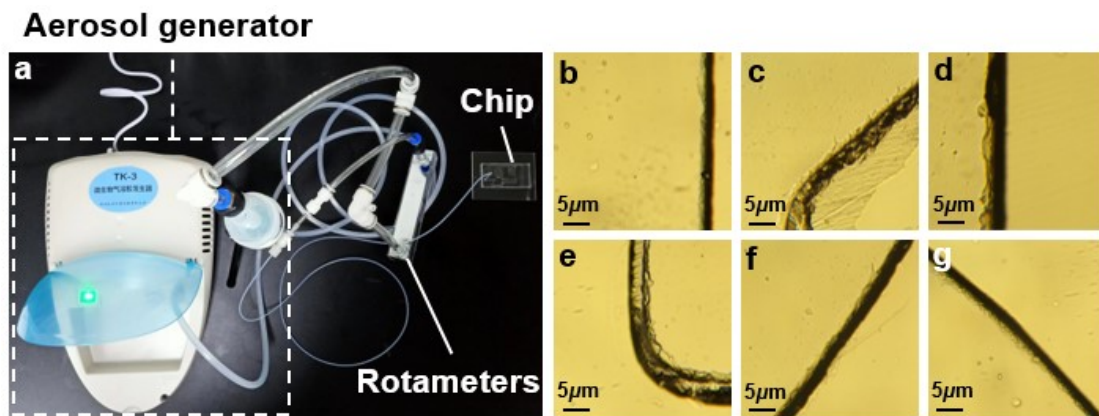

**Figure S1.** (a) The collection device. The internal structure of the chip (b-g): (b) The inner wall of the pretreatment channel. (c) The inner wall of the collection chamber. (d) The inner wall of the lysis chamber. (e) The inner wall of the dilution chamber. (f) The inner wall of the amplification chamber. (g) The inner wall of the control room.

**Figure S2. The syringe pump driving the chip.**

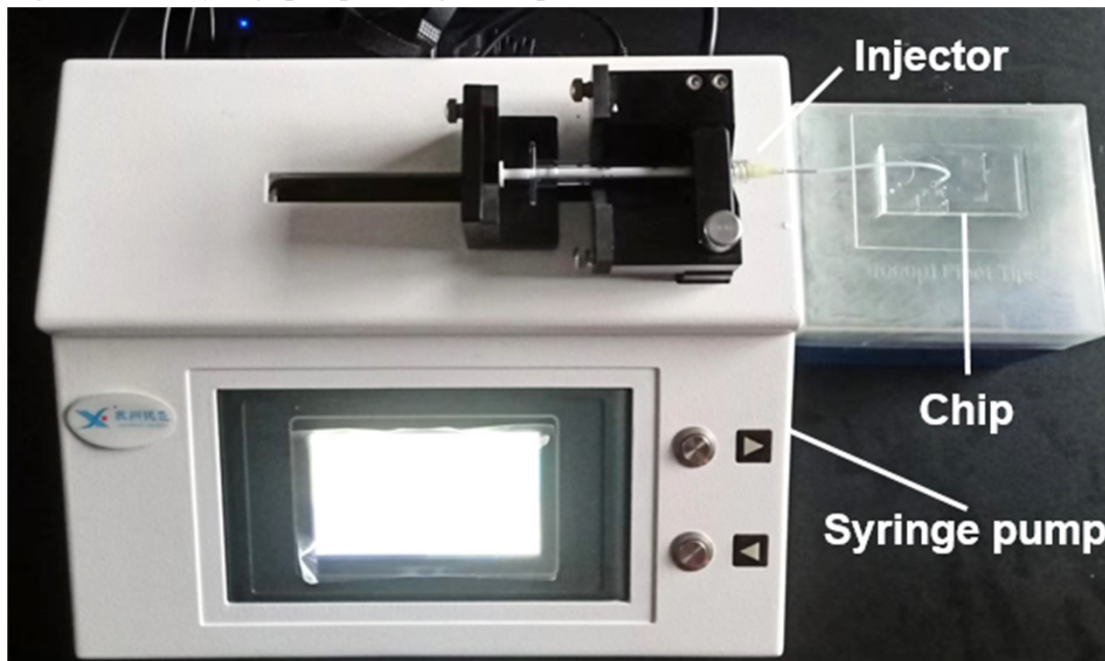

**Table S1. The primer sequences of G544 used in this study**

| Target | Primer name | Sequence (5'-3')                       |
|--------|-------------|----------------------------------------|
|        | F3          | GCAAGTCTGCATCCCAAGTC                   |
|        | B3          | CGACGGCAGCTTCATGG                      |
| G544   | FIP         | TGCAAAGAGACTGACTGGCCCCTTGCGACCCGAACCCG |
|        | BIP         | CCTCCGGTTCATCCCACGAGCTGGAGGGGAGCGA     |
|        | LF          | TGTTTCAGGAACCTTGGGTGG                  |
|        | LB          | TCCTGCTGCCTTACCGC                      |

**Table S2. The concentrations of each composition (for a single reaction) in the amplification chamber**

| Item                                | Volume ( $\mu$ L, for a single reaction) |
|-------------------------------------|------------------------------------------|
| ddH <sub>2</sub> O                  | 0.3                                      |
| MgSO <sub>4</sub> (100mM)           | 0.4                                      |
| 10 × Buffer (Mg <sup>2+</sup> free) | 1                                        |
| dNTP (10mM)                         | 1.4                                      |
| Betaine                             | 1.2                                      |
| Primer Mix                          | 2.8                                      |
| 10 × SYBR Green I                   | 1                                        |
| Bst DNA polymerase                  | 0.4                                      |

**Table S3 The CT value of each sample using two methods**

| CT value                 |                         |                       |
|--------------------------|-------------------------|-----------------------|
| Target: <i>U. virens</i> | Strong positive samples | Weak positive samples |
| 1                        | 8.622                   | 19.573                |
| 2                        | 8.952                   | 20.042                |
| 3                        | 7.677                   | 20.363                |
| 4                        | 7.996                   | 20.622                |
| 5                        | 8.421                   | 20.952                |
| 6                        | 7.931                   | 18.677                |
| 7                        | 8.268                   | 18.996                |
| 8                        | 8.937                   | 18.421                |
| 9                        | 8.070                   | 17.931                |
| 10                       | 8.074                   | 19.268                |
| 11                       | 7.775                   | 17.937                |
| 12                       | 7.411                   | 20.070                |
| 13                       | 8.640                   | 19.074                |
| 14                       | 8.253                   | 18.775                |
| 15                       | 8.088                   | 20.411                |
| 16                       | 8.430                   | 20.640                |
| 17                       | 7.899                   | 20.253                |
| 18                       | 8.535                   | 18.088                |
| 19                       | 8.353                   | 19.430                |
| 20                       | 8.254                   | 18.899                |

**Table S4. The one-on-one comparison of the CT value from common methods and the proposed method**

| No. | CT value |       |          |     |        |       |          |     |        |      |          |  |
|-----|----------|-------|----------|-----|--------|-------|----------|-----|--------|------|----------|--|
|     | RT-PCR   | LAMP  | POCT-PCR | No. | RT-PCR | LAMP  | POCT-PCR | No. | RT-PCR | LAMP | POCT-PCR |  |
| 1   | 26.51    | 18.96 | 27.48    | 41  | 29.62  | 23.87 | 30.51    | 81  | 0      | 0    | 0        |  |
| 2   | 24.63    | 17.02 | 26.14    | 42  | 33.75  | 26.96 | 0        | 82  | 0      | 0    | 0        |  |
| 3   | 27.92    | 20.17 | 29.41    | 43  | 31.28  | 25.26 | 0        | 83  | 0      | 0    | 0        |  |
| 4   | 27.60    | 20.53 | 27.99    | 44  | 32.95  | 27.08 | 34.87    | 84  | 0      | 0    | 0        |  |
| 5   | 25.08    | 17.45 | 26.87    | 45  | 26.19  | 20.80 | 26.55    | 85  | 0      | 0    | 0        |  |
| 6   | 29.91    | 21.33 | 30.74    | 46  | 24.32  | 15.07 | 25.83    | 86  | 0      | 0    | 0        |  |
| 7   | 30.49    | 22.89 | 30.81    | 47  | 32.71  | 0     | 33.97    | 87  | 0      | 0    | 0        |  |
| 8   | 28.63    | 21.27 | 29.75    | 48  | 28.90  | 21.46 | 29.15    | 88  | 0      | 0    | 0        |  |
| 9   | 33.67    | 27.09 | 0        | 49  | 27.33  | 22.02 | 29.84    | 89  | 0      | 0    | 0        |  |
| 10  | 32.05    | 26.76 | 34.37    | 50  | 30.67  | 24.01 | 32.71    | 90  | 0      | 0    | 0        |  |
| 11  | 32.87    | 25.45 | 34.50    | 51  | 33.65  | 27.07 | 0        | 91  | 0      | 0    | 0        |  |
| 12  | 29.95    | 22.70 | 30.72    | 52  | 30.12  | 23.75 | 31.74    | 92  | 0      | 0    | 0        |  |
| 13  | 34.73    | 27.69 | 0        | 53  | 28.83  | 20.62 | 30.45    | 93  | 0      | 0    | 0        |  |
| 14  | 31.56    | 25.97 | 0        | 54  | 27.46  | 20.21 | 28.05    | 94  | 0      | 0    | 0        |  |
| 15  | 29.81    | 0     | 31.46    | 55  | 30.78  | 24.09 | 0        | 95  | 0      | 0    | 0        |  |
| 16  | 31.78    | 24.07 | 33.29    | 56  | 26.67  | 19.89 | 28.33    | 96  | 0      | 0    | 0        |  |
| 17  | 35.59    | 28.48 | 37.25    | 57  | 29.97  | 0     | 31.55    | 97  | 0      | 0    | 0        |  |
| 18  | 0        | 0     | 0        | 58  | 30.40  | 23.99 | 30.83    | 98  | 0      | 0    | 0        |  |
| 19  | 0        | 0     | 0        | 59  | 27.70  | 20.69 | 28.85    | 99  | 0      | 0    | 0        |  |
| 20  | 0        | 0     | 0        | 60  | 29.08  | 22.54 | 0        | 100 | 0      | 0    | 0        |  |
| 21  | 0        | 0     | 0        | 61  | 29.75  | 22.06 | 30.66    | 101 | 0      | 0    | 0        |  |
| 22  | 0        | 0     | 0        | 62  | 28.44  | 21.97 | 29.31    | 102 | 0      | 0    | 0        |  |
| 23  | 0        | 0     | 0        | 63  | 25.88  | 17.18 | 26.35    | 103 | 0      | 0    | 0        |  |
| 24  | 0        | 0     | 29.97    | 64  | 26.07  | 20.34 | 28.63    | 104 | 0      | 0    | 0        |  |
| 25  | 0        | 0     | 0        | 65  | 29.47  | 20.87 | 31.67    | 105 | 0      | 0    | 32.25    |  |
| 26  | 0        | 0     | 0        | 66  | 32.98  | 26.85 | 34.03    | 106 | 0      | 0    | 30.53    |  |
| 27  | 0        | 0     | 0        | 67  | 30.01  | 24.40 | 31.17    | 107 | 0      | 0    | 0        |  |
| 28  | 0        | 0     | 0        | 68  | 28.59  | 21.70 | 29.83    | 108 | 0      | 0    | 0        |  |
| 29  | 0        | 0     | 0        | 69  | 27.66  | 20.55 | 29.40    | 109 | 0      | 0    | 0        |  |
| 30  | 0        | 0     | 0        | 70  | 25.84  | 16.68 | 27.77    | 110 | 0      | 0    | 0        |  |
| 31  | 0        | 0     | 0        | 71  | 29.48  | 0     | 30.70    | 111 | 0      | 0    | 0        |  |
| 32  | 0        | 0     | 0        | 72  | 31.33  | 23.67 | 32.09    | 112 | 0      | 0    | 0        |  |
| 33  | 0        | 0     | 0        | 73  | 28.74  | 21.19 | 30.06    | 113 | 0      | 0    | 0        |  |
| 34  | 0        | 0     | 0        | 74  | 30.85  | 23.07 | 0        | 114 | 0      | 0    | 0        |  |
| 35  | 0        | 0     | 0        | 75  | 26.63  | 19.04 | 27.80    | 115 | 0      | 0    | 0        |  |
| 36  | 0        | 0     | 0        | 76  | 27.11  | 19.08 | 28.35    | 116 | 0      | 0    | 0        |  |
| 37  | 0        | 0     | 0        | 77  | 0      | 0     | 0        | 117 | 0      | 0    | 0        |  |

|    |   |   |   |    |   |   |       |     |   |   |   |
|----|---|---|---|----|---|---|-------|-----|---|---|---|
| 38 | 0 | 0 | 0 | 78 | 0 | 0 | 0     | 118 | 0 | 0 | 0 |
| 39 | 0 | 0 | 0 | 79 | 0 | 0 | 32.80 | 119 | 0 | 0 | 0 |
| 40 | 0 | 0 | 0 | 80 | 0 | 0 | 0     | 120 | 0 | 0 | 0 |

---
